# Supplementary material
Source: PubMed Central journal article supplement (PMC3807434)
Supplement: JB.00707-13_zjb999092832so1.pdf [file JB.00707-13_zjb999092832so1.pdf]

Amari *et al.*,  
SUPPLEMENTARY MATERIAL

Table S1. Oligonucleotides

| Oligonucleotide                                        | Sequence                           |
|--------------------------------------------------------|------------------------------------|
| <b><u>RT-PCR</u></b>                                   |                                    |
| mreBf                                                  | CTGTCGATCGACCTGGG                  |
| mreBr                                                  | CAGCCATCGGCTCTTCG                  |
| dspIf                                                  | GACCTGACCCACAAGCTC                 |
| dspIr                                                  | GGCGAACATGTTCAGGTCG                |
| <b><u>Directional Cloning</u></b>                      |                                    |
| dspI_NheI_for                                          | GCGCGCGCgctagcCATGATCCAGTGAGGGAC * |
| dspI_SacI_rev                                          | GCGCGCGCgagctcGGGAAGGCTCAGCAGTTG*  |
| dspI-PROM_XhoI-for                                     | GCGCGCGCctcgagCAGGAAGTCCTCCGCCAG*  |
| dspI-PROM_EcoRI-rev                                    | GCGCGCGCgaattcGGTCGCCTCCGCTTCCG*   |
| pMJT-MCS_for                                           | GACCGCGAATGGTGAG                   |
| pMJT-MCS_rev                                           | GAGCTGATACCGCTCG                   |
| attB_for                                               | CGAGTGGTTTAAGGCAACGGTCTTGA         |
| attB_rev                                               | CGAGTTGTTCCACCAGGCCGA ACT          |
| <b><u>PCR - <i>dspI</i> promoter determination</u></b> |                                    |
| 54610-a                                                | GAGGTCTGTACGGAACGCTTC              |
| 54620-a                                                | CAGCTGATCGACGGCGAATG               |
| 54620-b                                                | GTGCGCTTCTATACCGAGACC              |
| 54630-a                                                | CATCACTTCCCGGTGGAAGTC              |
| 54630-b                                                | CAACGATTATCCGCTGGAGCG              |
| 54640-a                                                | CCTACAAGGCTTCCTCCTTCG              |

\*restriction sites are indicated by nucleotides in lower case

**A**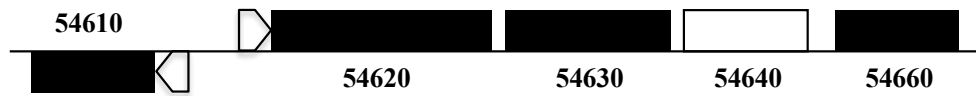**B**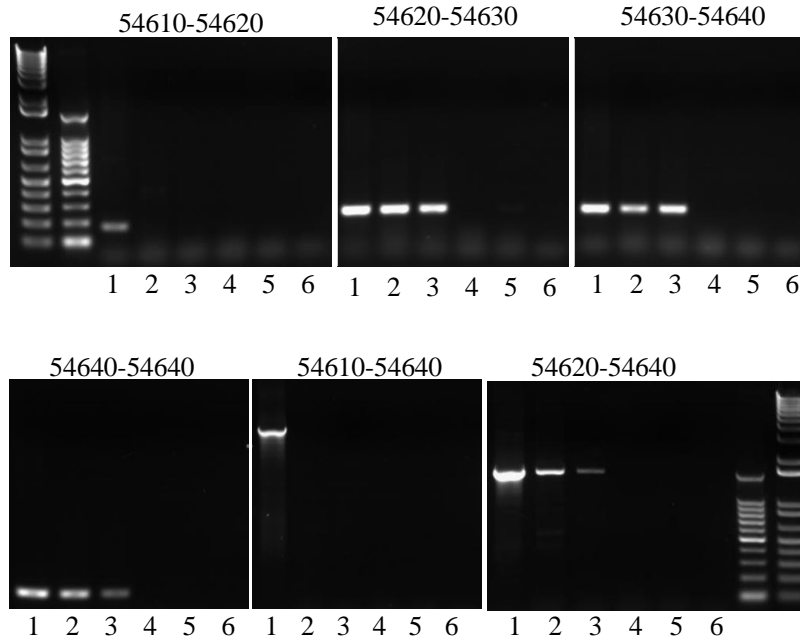

FIG. S1. The genes 54620 and 54630 are co-transcribed with *dspI* (54640). (A) The *dspI* operon in *P. aeruginosa*. (B) PCR amplification using oligonucleotide primers specific for genes in the *dspI* operon of PA14 genomic DNA (1), cDNA from planktonic or biofilm cells (2, 3), cDNA from planktonic or biofilm cells prepared with no reverse transcriptase (4, 5), or no DNA control (6). The promoter region for this operon was determined to lie upstream of the gene 54620.

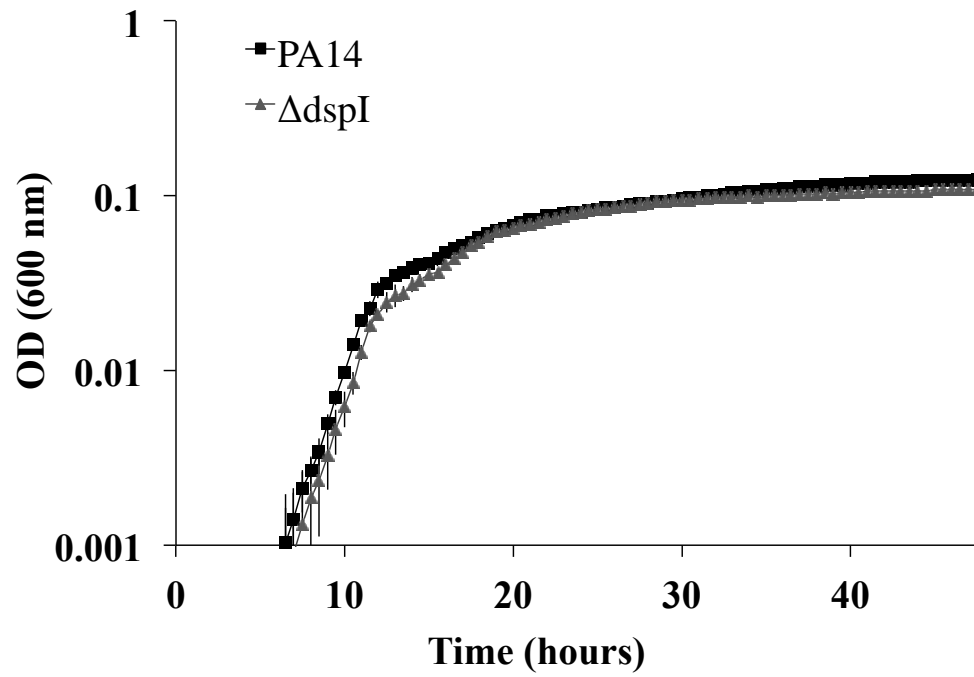

FIG. S2. Growth curves of *P. aeruginosa* PA14 and  $\Delta dspI$  in 5% LB medium. Mutation of *dspI* has no effect on bacterial growth rate. Each curve represents average of 20 replicates. Error bars indicate one standard deviation.

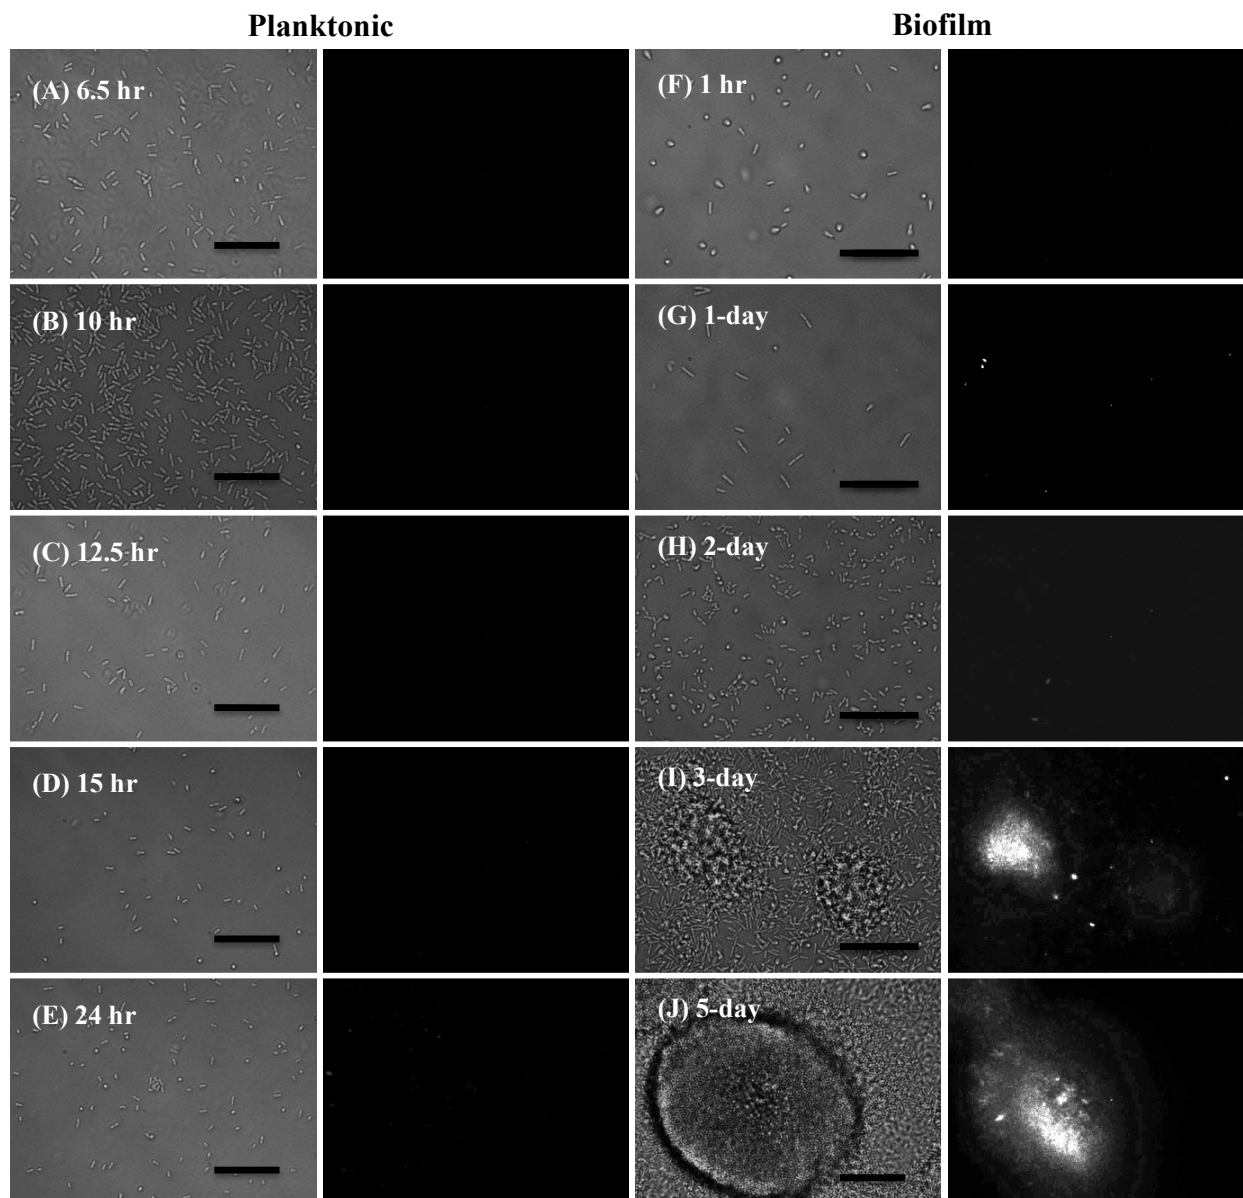

FIG S3. Microscopic analysis of *dspI* transcriptional reporter activity during planktonic and biofilm growth. *P. aeruginosa* PA14 harboring a promoterless *lacZ* construct was grown in batch or continuous culture in medium supplemented with MUG. The following planktonic conditions are shown: (A) 6.5 hr; (B) 10 hr; (C) 12.5 hr; (D) 15 hr; and (E) 24 hr. The following biofilm conditions are shown: (F) 1 hr; (G) 1-day; (H) 2-day; (I) 3-day; (J) 5-day. Bright field image (left panel) and fluorescent cells displaying  $\beta$ -galactosidase activity (right panel). Scale bar, 20  $\mu$ m.

## **SUPPLEMENTARY MATERIALS AND METHODS**

**Growth Curves.** Growth curves of *P. aeruginosa* PA14 and  $\Delta dspI$  were performed on cultures grown in 96-well microtiter plates at 23°C. Overnight cultures were grown in LB, OD 600 adjusted, and diluted 1:100 into 5% LB. Absorbance readings (OD 600) were taken every 30 minutes for 48 hours. All growth curves were carried out in triplicate, with 20 replicates per strain.
